# Supplementary material for: Genetic conflicts with Plasmodium parasites and functional constraints shape the evolution of erythrocyte cytoskeletal proteins
Source: PubMed Central journal article supplement (PMC6168477; doi:10.1038/s41598-018-33049-y), 2018-10-02
Supplement: 41598_2018_33049_MOESM1_ESM.pdf [file 41598_2018_33049_MOESM1_ESM.pdf]

# **Genetic conflicts with *Plasmodium* parasites and functional constraints shape the evolution of erythrocyte cytoskeletal proteins**

Manuela Sironi<sup>1</sup> , Diego Forni<sup>1</sup> , Mario Clerici<sup>2,3</sup> , Rachele Cagliani<sup>1\*</sup>

<sup>1</sup> Bioinformatics, Scientific Institute, IRCCS E. Medea, 23842 Bosisio Parini, Lecco, Italy.

<sup>2</sup> Department of Physiopathology and Transplantation, University of Milan, 20090 Milan, Italy.

<sup>3</sup> Don C. Gnocchi Foundation ONLUS, IRCCS, 20148 Milan, Italy.





**Supplementary Table S2.** List of *Plasmodium* strains/isolates.

|                      |                      | Strain/Isolate        | Nucleotide ID | Protein ID used to interrogate ENA |
|----------------------|----------------------|-----------------------|---------------|------------------------------------|
| <b>KAHRP</b>         | <i>P. falciparum</i> | Pf_3D7                | XM_001349498  |                                    |
|                      |                      | Pf_CAMP/Malaysia      | KI927677      |                                    |
|                      |                      | Pf_FCC1/HN            | AF275687      |                                    |
|                      |                      | Pf_FCH/4              | KI927792      |                                    |
|                      |                      | Pf_IGH-CR14           | GG665204      |                                    |
|                      |                      | Pf_IT                 | PFIT_0201300  |                                    |
|                      |                      | Pf_Mali PS096         | ETW51738      |                                    |
|                      |                      | Pf_NF135/5.C10        | KI926017      |                                    |
|                      |                      | Pf_NF17               | Y00060        |                                    |
|                      |                      | Pf_NF54               | KE123721      |                                    |
|                      |                      | Pf_Palo Alto/Uganda   | KI927240      |                                    |
|                      |                      | Pf_Santa Lucia        | EUT93034      |                                    |
|                      |                      | Pf_UGT5.1             | KE124379      |                                    |
|                      |                      | Pf_Vietnam Oak-Knoll  | KI925011      |                                    |
|                      | <i>P. qaboni</i>     | Pg_SY75               | LVLB01000003  |                                    |
| <i>P. reichenowi</i> | Pr_CDC               | HG810763              |               |                                    |
| <b>MESA</b>          | <i>P. falciparum</i> | Pf_3D7                | XM_001351531  |                                    |
|                      |                      | Pf_Dd2                | DS016123      | KOB85353                           |
|                      |                      | Pf_FCH/4              | KI928169      | ETW26829                           |
|                      |                      | Pf_HB3                | CH672045      | KOB62125                           |
|                      |                      | Pf_IGH-CR14           | GG665375      | KNG77757                           |
|                      |                      | Pf_IT                 | PFIT_0500900  |                                    |
|                      |                      | Pf_Palo Alto/Uganda   | AF056936      |                                    |
|                      |                      | Pf_RAJ116             | GG664386      | KNC37107                           |
|                      |                      | Pf_Santa Lucia        | KE123479      | EUT91020                           |
|                      | Pf_UGT5.1            | KE124768              | EWC73405      |                                    |
| <i>P. reichenowi</i> | Pr_CDC               | HG810766              |               |                                    |
| <b>EMP3</b>          | <i>P. falciparum</i> | Pf_3D7                | XM_001349497  |                                    |
|                      |                      | Pf_7GB                | KE123587      | EUR79230                           |
|                      |                      | Pf_CAMP/Malaysia      | KI927459      | ETW63921                           |
|                      |                      | Pf_IGH-CR14           | GG665204      | KNG76792                           |
|                      |                      | Pf_IT                 | PFIT_0201200  |                                    |
|                      |                      | Pf_MaliPS096_E11      | KI925479      | ETW51737                           |
|                      |                      | Pf_MC                 | AH008249      |                                    |
|                      |                      | Pf_NF135/5.C10        | KI926017      | ETW45260                           |
|                      |                      | Pf_NF54               | KE123721      | EWC90929                           |
|                      |                      | Pf_Palo Alto/Uganda   | KI927240      | ETW57704                           |
|                      |                      | Pf_Santa Lucia        | KE123473      | EUT93033                           |
|                      |                      | Pf_Tanzania (2000708) | KI926269      | ETW39099                           |
|                      |                      | Pf_UGT5.1             | KE124379      | EWC79156                           |
|                      |                      | <i>P. qaboni</i>      | Pg_SY75       | XM_018783133                       |
|                      | <i>P. reichenowi</i> | Pr_CDC                | HG810763      |                                    |

**Note.** ENA: European Nucleotide Archive.
